# Supplementary material for: Trends and drivers of government health spending in sub-Saharan Africa, 1995–2015
Source: PubMed Central journal article supplement (PMC6350738; doi:10.1136/bmjgh-2018-001159), 2019-01-13
Supplement: bmjgh-2018-001159supp001.pdf [file bmjgh-2018-001159supp001.pdf]

## Annex

### Transparency International Corruption Perception Index

Since 1995, Transparency International has produced the Corruption Perception Index (CPI), an index measure of the perceptions of corruption globally. The CPI is an aggregate of the perception of country experts and business people of corrupt practices in countries around the world. The most recently released – 2017 report- relied on surveys from 13 different sources and 12 different institutions that measure perceptions of corruption to generate estimates. It has a scale of 0 to 100, where 0 represents countries with the highest levels of corruption and 100 represents countries with the lowest levels of corruption. The measure captures perceptions of corruption in the previous two years. In 2012, the methodology was improved to make estimates historically comparable. In this analysis, to make earlier years of data comparable, reported values were scaled up by a factor of 10.

Source: [https://www.transparency.org/news/feature/corruption\\_perceptions\\_index\\_2017#resources](https://www.transparency.org/news/feature/corruption_perceptions_index_2017#resources)

Test 1: Hausman test – Fixed effects or Random effects model?

|                                                     |
|-----------------------------------------------------|
| Test: Ho: difference in coefficients not systematic |
| $\chi^2(7) = (b-B)'[(V_b - V_B)^{-1}](b-B)$         |
| $= 31.60$                                           |
| Prob> $\chi^2$ = 0.0000                             |
| ( $V_b - V_B$ is not positive definite)             |

Conclusion: Use fixed effects.

Test 2: Inclusion of time fixed effects

|                    |
|--------------------|
| F( 20, 883) = 1.46 |
| Prob > F = 0.0886  |

Conclusion: Time fixed effects inclusion not necessary but included in model to be conservative.

Test 3: Check for heteroskedasticity

|                                                                                         |
|-----------------------------------------------------------------------------------------|
| Modified Wald test for groupwise heteroskedasticity<br>in fixed effect regression model |
| H0: $\sigma(i)^2 = \sigma^2$ for all i                                                  |
| $\chi^2(46) = 2471.08$                                                                  |
| Prob> $\chi^2$ = 0.0000                                                                 |

Conclusion: Modified Wald test for groupwise heteroskedasticity in fixed effect regression model indicates heteroskedasticity is present. Huber white sandwich estimators is implemented to correct using 'robust' option to get heteroscedasticity robust standard errors.

#### Test 4: Serial correlation

|                                                   |
|---------------------------------------------------|
| Wooldridge test for autocorrelation in panel data |
| H0: no first order autocorrelation                |
| F( 1, 45) = 216.840                               |
| Prob > F = 0.0000                                 |

Conclusion: Serial correlation test shows that we are unable to reject that we have first-order autocorrelation.

#### Unit root test results

| IPS unit root tests         |             |             |             |             |             |
|-----------------------------|-------------|-------------|-------------|-------------|-------------|
| Variable                    | L0          | LOTrend     | L1Trend     | L2Trend     | L3Trend     |
| GDPpc                       | 5.4469      | 1.8938      | 0.1187      | 0.5217      | -0.4070     |
| GHEpc                       | 6.4184      | 5.9228      | -0.7852     | 1.6528      | n/a         |
| GGE/GDP                     | -0.5900     | -2.7011**   | -0.6683     | 0.5719      | -1.2153     |
| DAHpc                       | -4.0447***  | -7.5651***  | -0.9132     | 0.0701      | 0.0200      |
| Corruption perception Index | 1.3153      | 1.7114      | 0.7093      | 0.7940      | 1.1529      |
|                             |             |             |             |             |             |
| Fisher-type ADF             |             |             |             |             |             |
| Variable                    |             |             |             |             |             |
| GDPpc                       | 95.4208     | 99.6046     | 135.4819*** | 98.2997     | 131.3327*** |
| GHEpc                       | 34.7977     | 34.6021     | 125.4375*** | 65.6173     | 88.4386     |
| GGE/GDP                     | 120.2086**  | 168.3624*** | 120.3653**  | 84.2195     | 150.9920*** |
| DAHpc                       | 182.4351*** | 314.6987*** | 151.1730*** | 117.3479**  | 164.1679*** |
| Corruption perception Index | 78.6978     | 69.5186     | 96.8922     | 138.2007*** | 118.8670**  |

Notes: \*\*\* significant at 1%; \*\* significant at 5%; \*significant at 10%. For Im, Pesaran, and Shin unit root tests, t-tilde-bar values are presented. For Fisher-type ADF tests, inverse chi-squared statistics are presented. Natural logs of per capita values are used for macroeconomic variables. 'L' denotes the number of lags included and 'trend' refers to a test for trend-stationarity.
